# Supplementary figures and images for: Mechanistic formation of drug-encapsulated Janus particles through emulsion solvent evaporation
Source: PubMed Central journal article supplement — RSC Adv. 2018 Apr 30;8(29):16032–42. doi: 10.1039/c8ra02271b (PMC9080239; doi:10.1039/c8ra02271b), 2018-04-30

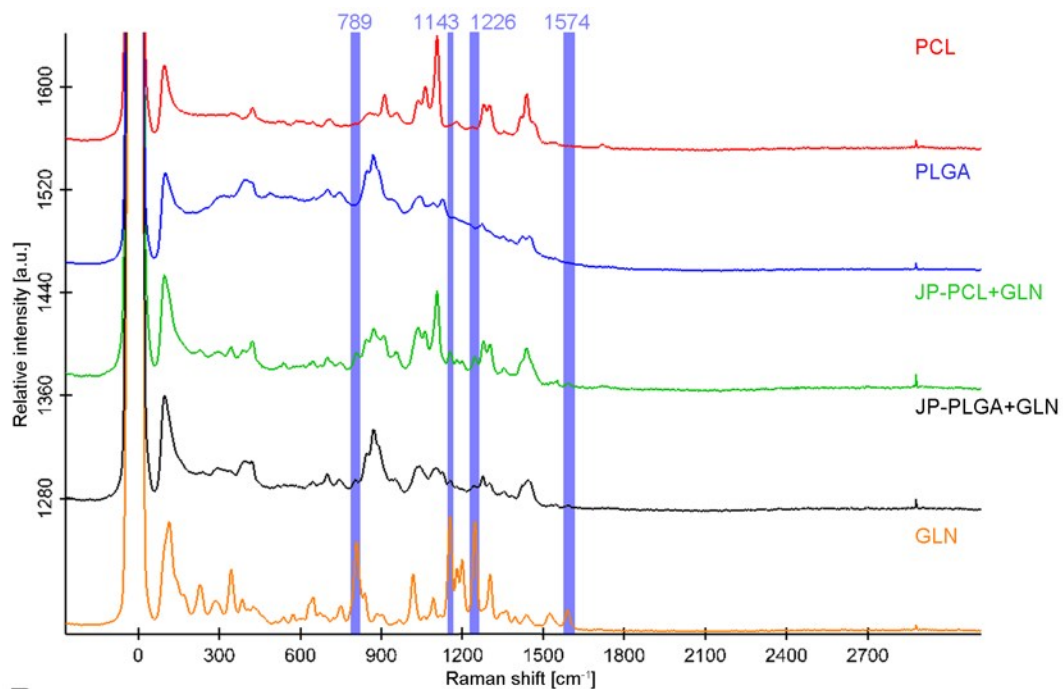

Figure S1

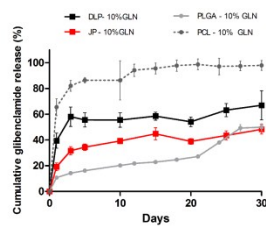

Figure S2

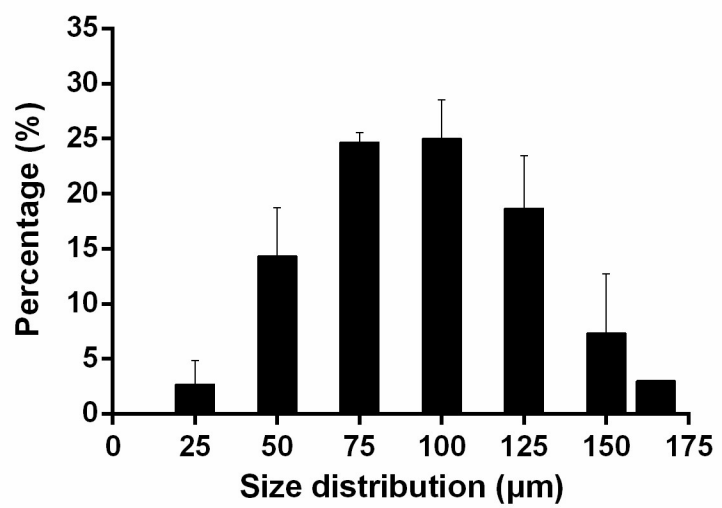

Figure S3

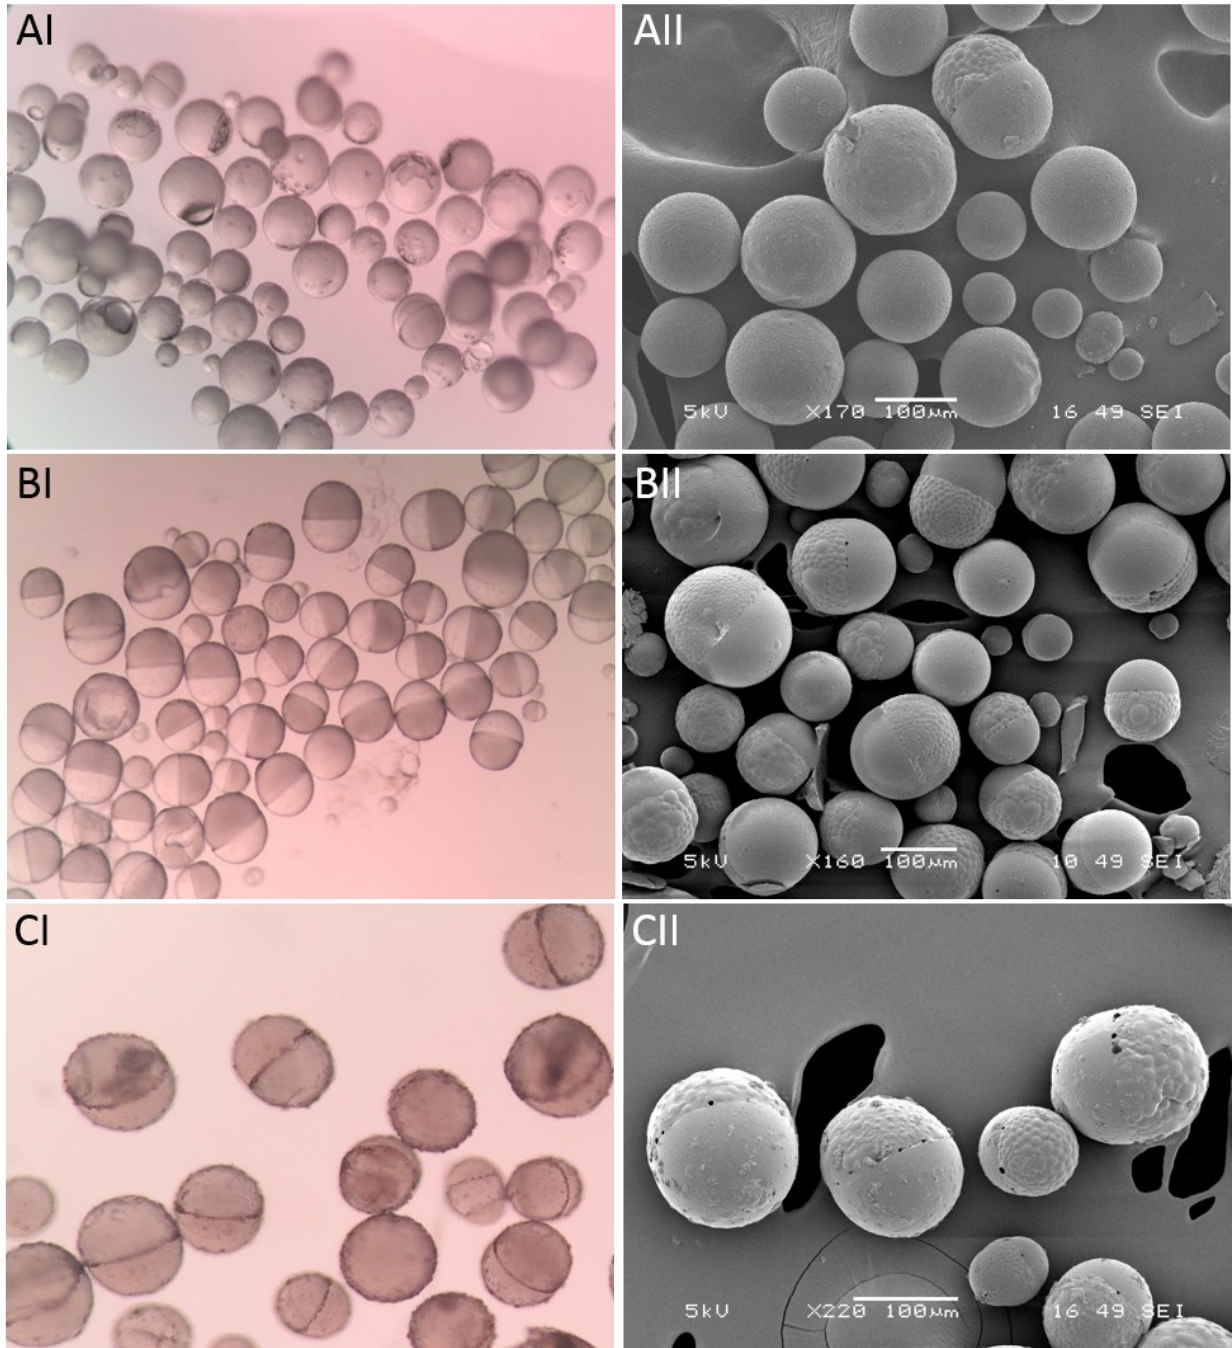

Figure S4

Supplement: RA-008-C8RA02271B-s001.pdf [file RA-008-C8RA02271B-s001.pdf]
